# Supplementary material
Source: PubMed Central journal article supplement (PMC4237972)
Supplement: supp_dc14-0973v140973_DC140973SupplementaryData.pdf [file supp_dc14-0973v140973_DC140973SupplementaryData.pdf]

SUPPLEMENTARY DATA

**Supplementary Table 1. Comparison of baseline characteristics between participants with and without M40 MRI**

| Baseline Characteristics            | Total*<br>(N=614) | M40 MRI Data            |                         | p-value |
|-------------------------------------|-------------------|-------------------------|-------------------------|---------|
|                                     |                   | M40 Missing<br>(N=111)* | M40 Present<br>(n=503)* |         |
| Age                                 | 62.37 +/- 5.74    | 63.22 +/- 6.09          | 62.18 ± 5.65            | 0.0856  |
| Gender (female)                     | 273 (44.46%)      | 40 (36.04%)             | 233 (46.32)             | 0.0484  |
| Race                                |                   |                         |                         | 0.6400  |
| Non-Hispanic White                  | 419 (68.4%)       | 78 (70.9%)              | 341 (67.8)              |         |
| African-American                    | 103 (16.8%)       | 14 (12.7%)              | 89 (17.7)               |         |
| Hispanic                            | 39 ( 6.4%)        | 8 ( 7.3%)               | 31 (6.2)                |         |
| Other                               | 52 ( 8.5%)        | 10 ( 9.1%)              | 42 (8.3)                |         |
| Education level                     |                   |                         |                         | 0.1611  |
| Less than HS                        | 62 (10.1%)        | 16 (14.5%)              | 46 (9.1)                |         |
| High School Grad                    | 148 (24.1%)       | 26 (23.6%)              | 122 (24.3)              |         |
| Some College                        | 209 (34.1%)       | 41 (37.3%)              | 168 (33.4)              |         |
| College Grad or More                | 194 (31.6%)       | 27 (24.5%)              | 167 (33.2)              |         |
| Clinical Center Network             |                   |                         |                         | 0.0205  |
| A                                   | 274 (44.7%)       | 38 (34.5%)              | 236 (46.9%)             |         |
| B                                   | 98 (16.0%)        | 27 (24.5%)              | 71 (14.1%)              |         |
| C                                   | 86 (14.0%)        | 18 (16.4%)              | 68 (13.5%)              |         |
| D                                   | 155 (25.3%)       | 27 (24.5%)              | 128 (25.4%)             |         |
| DSST Cognition Score                | 53.41 +/- 16.09   | 47.63 +/- 17.34         | 54.67 ± 15.54           | <.0001  |
| BMI (continuous)                    | 32.64 +/- 5.11    | 32.84 +/- 4.98          | 32.59 ± 5.14            | 0.6428  |
| <25                                 | 36 ( 5.9%)        | 5 ( 4.5%)               | 31 (6.2%)               | 0.4857  |
| =>25 to <30                         | 166 (27.1%)       | 26 (23.6%)              | 140 (27.8%)             |         |
| 30+                                 | 411 (67.0%)       | 79 (71.8%)              | 332 (66.0%)             |         |
| History of Cardiovascular Disease   | 160 (26.06%)      | 32 (28.83%)             | 128 (25.45%)            | 0.4626  |
| Systolic blood pressure             | 134.8 +/- 17.91   | 135.5 +/- 18.24         | 134.6 ± 17.85           | 0.6683  |
| Treatment assignment                |                   |                         |                         |         |
| Glucose Control (Intensive)         | 293 (47.72%)      | 63 (56.76%)             | 230 (45.73)             | 0.0352  |
| BP Control (Intensive)              | 193 (31.43%)      | 40 (36.04%)             | 153 (30.42)             | 0.2485  |
| Lipid Control (Fibrate)             | 115 (18.73%)      | 26 (23.42%)             | 89 (17.69)              | 0.1614  |
| Severity of diabetes                |                   |                         |                         |         |
| Duration of diabetes                | 9.94 +/- 7.18     | 10.14 +/- 7.68          | 9.89 +/- 7.08           | 0.7470  |
| Haemoglobin A1C level, %            | 8.18 +/- 1.00     | 8.39 +/- 1.27           | 8.14 +/- 0.93           | 0.0158  |
| Glucose level, mg/dl                | 172.9 +/- 54.17   | 176.1 +/- 63.29         | 172.2 +/- 52.05         | 0.5034  |
| Amputation                          | 7 (1.14%)         | 1 (0.90%)               | 6 (1.19%)               | 0.7931  |
| Neuropathy Score                    | 0.44 +/- 0.50     | 0.53 +/- 0.50           | 0.42 +/- 0.49           | 0.0490  |
| Visual Acuity                       | 75.80 +/- 10.24   | 72.35 +/- 12.69         | 76.54 +/- 9.48          | 0.0001  |
| Serum Creatinine                    | 0.89 +/- 0.20     | 0.91 +/- 0.20           | 0.88 +/- 0.20           | 0.2603  |
| LDL                                 | 101.9 +/- 33.43   | 105.4 +/- 38.17         | 101.2 +/- 32.32         | 0.2415  |
| HDL                                 | 43.72 +/- 12.22   | 43.13 +/- 13.18         | 43.84 +/- 12.02         | 0.5815  |
| Any hypertension med use (baseline) | 520 (84.69%)      | 95 (85.59%)             | 425 (84.49%)            | 0.7723  |
| Any statin use (baseline)           | 422 (68.73%)      | 59 (53.15%)             | 363 (72.17%)            | <.0001  |
| Any insulin use (baseline)          | 197 (32.08%)      | 43 (38.74%)             | 154 (30.62%)            | 0.0971  |
| Basal Insulin                       | 155 (25.24%)      | 35 (31.53%)             | 120 (23.86%)            | 0.0921  |
| Bolus Insulin                       | 75 (12.21%)       | 16 (14.41%)             | 59 (11.73%)             | 0.4343  |
| Premixed Insulin                    | 43 (7.00%)        | 9 (8.11%)               | 34 (6.76%)              | 0.6143  |

\* Results are presented as N (%) or mean ± SD

SUPPLEMENTARY DATA

**Supplementary Figure 1. Results from Four Separate Models Adjusting for Different Covariates<sup>(1)</sup>**

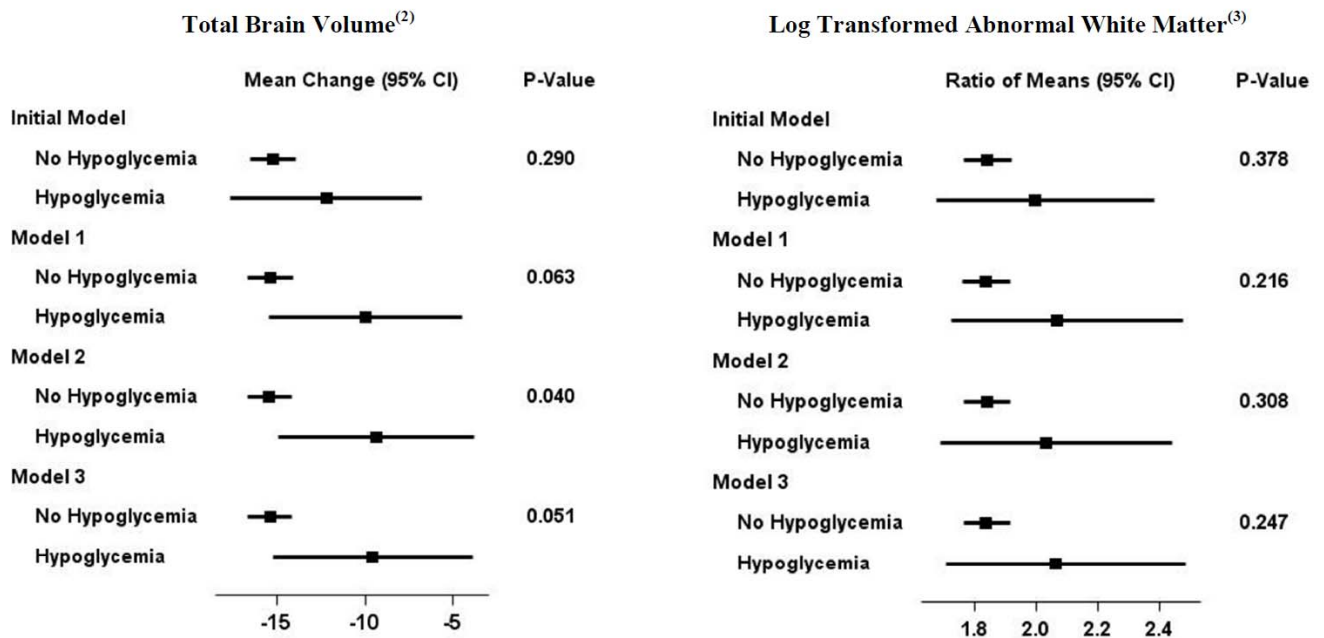

- (1) The initial model controlled for only the ICV and randomization factors; Model 1 added demographic, laboratory and medication use covariates to the covariates in the initial model; Model 2 added severity of diabetes to the covariates in Model 1; Model 3 added insulin use to the factors in Model 2.
- (2) Results represent adjusted means and confidence intervals obtained from ANCOVA models.
- (3) Because a log transformation was required, results represent the ratio of the geometric mean at follow-up to the geometric mean at baseline.
